# Supplementary material for: SPHK1 promotes HNSCC immune evasion by regulating the MMP1-PD-L1 axis
Source: PubMed Central journal article supplement (PMC11610131; doi:10.7150/thno.102390), 2024-10-28
Supplement: thnov14p7199s1.pdf [file thnov14p7199s1.pdf]

# Figure S1

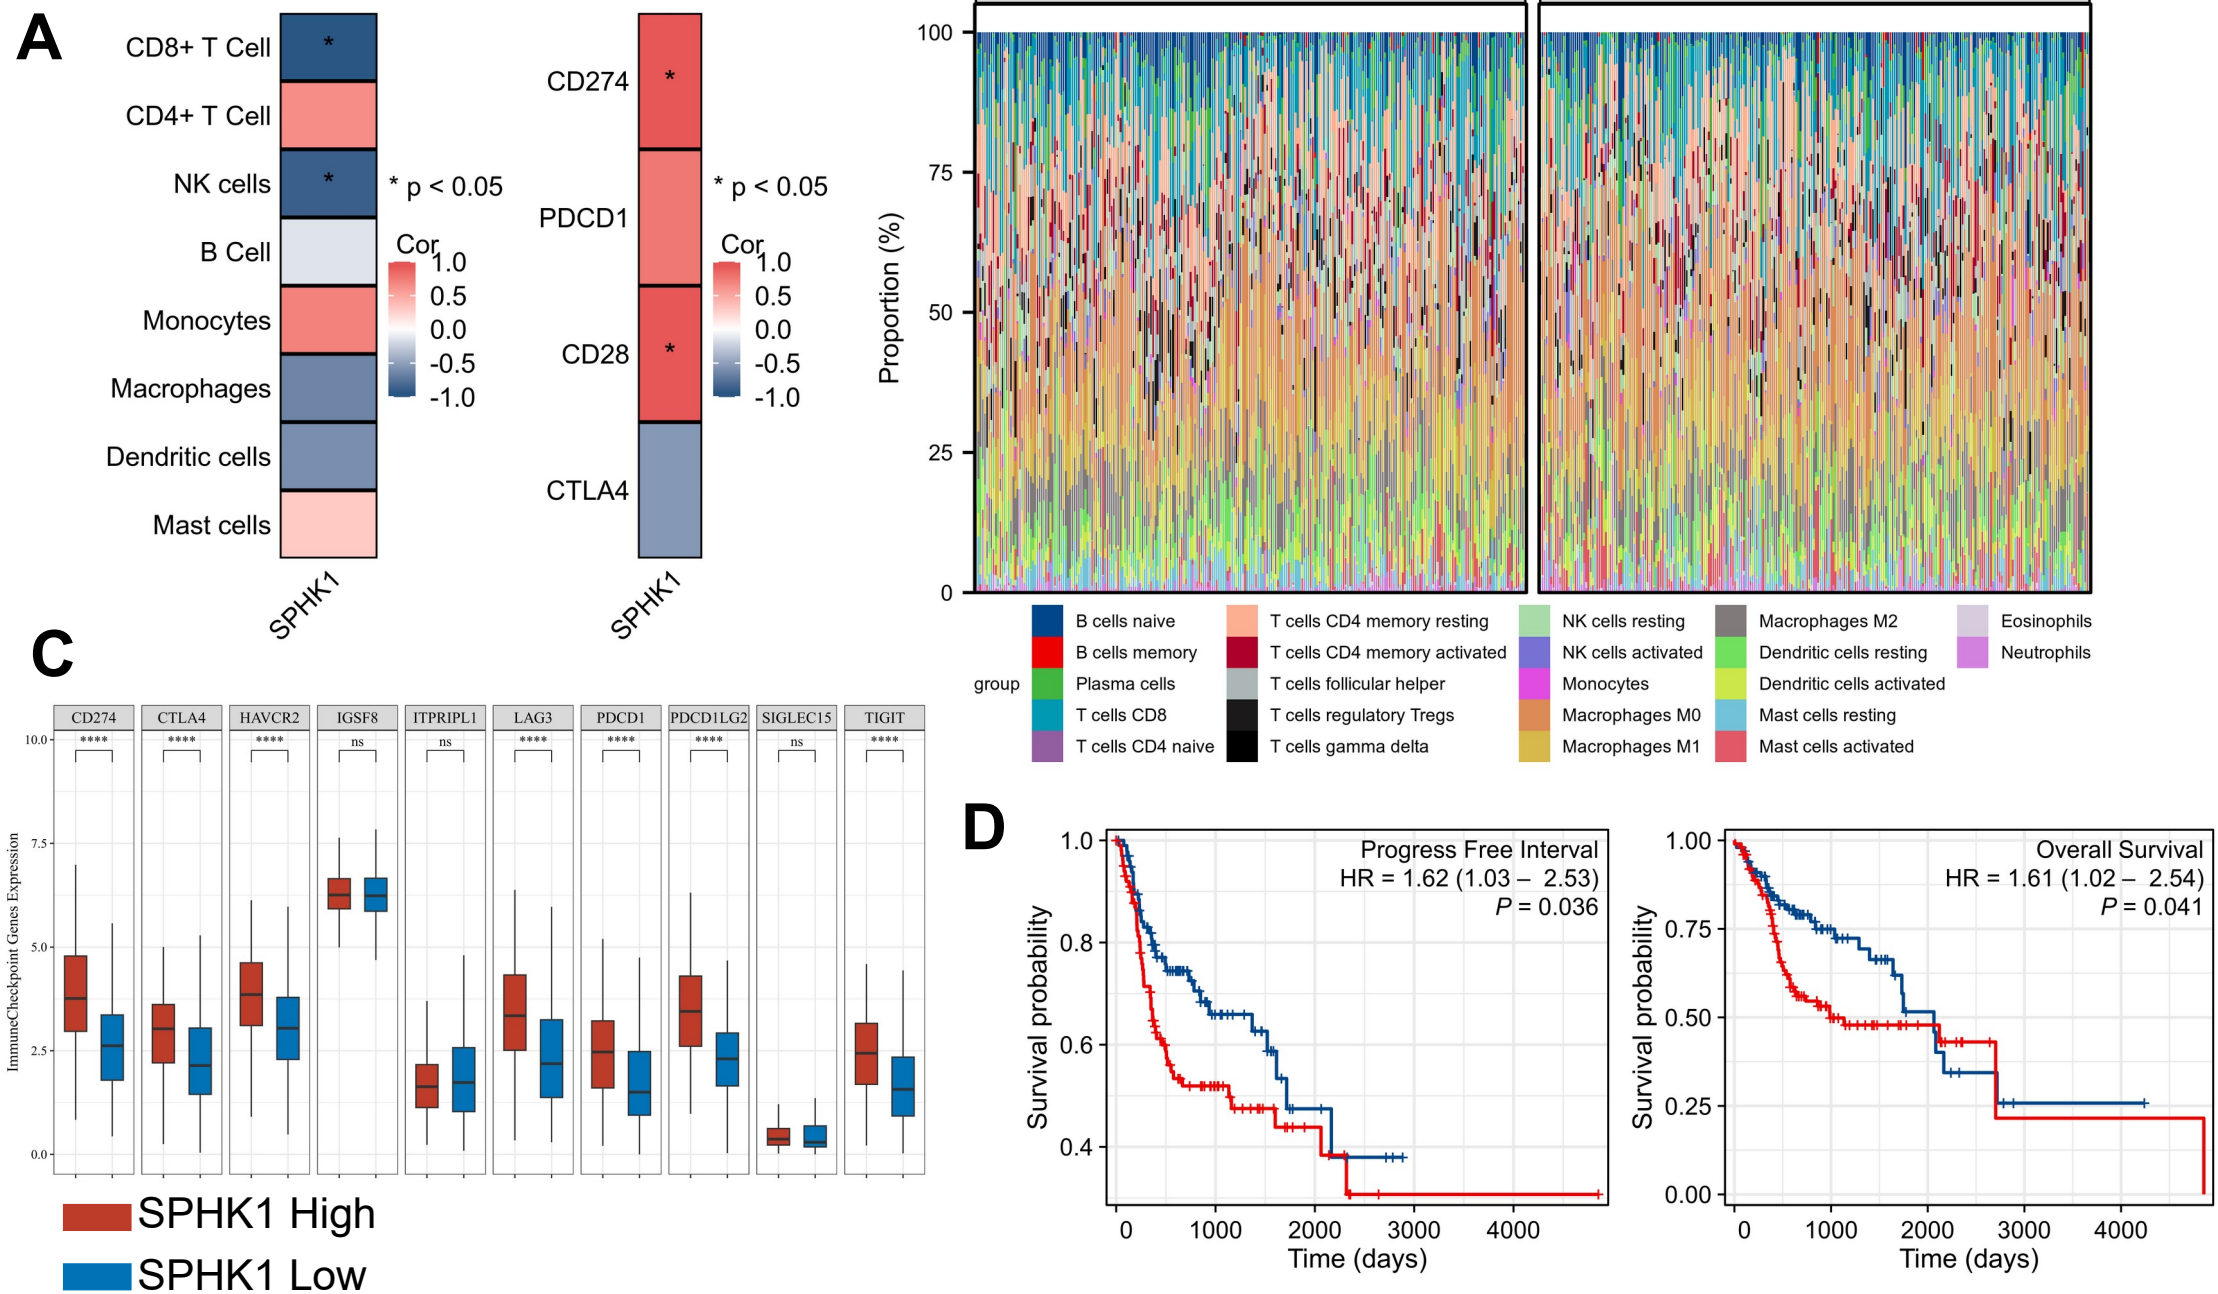

**Figure S1.** **A.** Correlation between the proportion of immune-infiltrating cells and immune checkpoint inhibitor levels with the level of SPHK1 in six patients with oral squamous carcinoma. **B-C.** Correlation between SPHK1 and immune infiltrating cells in HNSCC patients analyzed by TCGA data. **C.** Correlation between SPHK1 and immune checkpoint levels in HNSCC patients analyzed by TCGA data. **D.** Overall survival, progression-free survival Kaplan-Meier analysis based on SPHK1 expression level in HNSCC in TCGA database. Statistical analysis was performed using the log-rank test.

# Figure S2

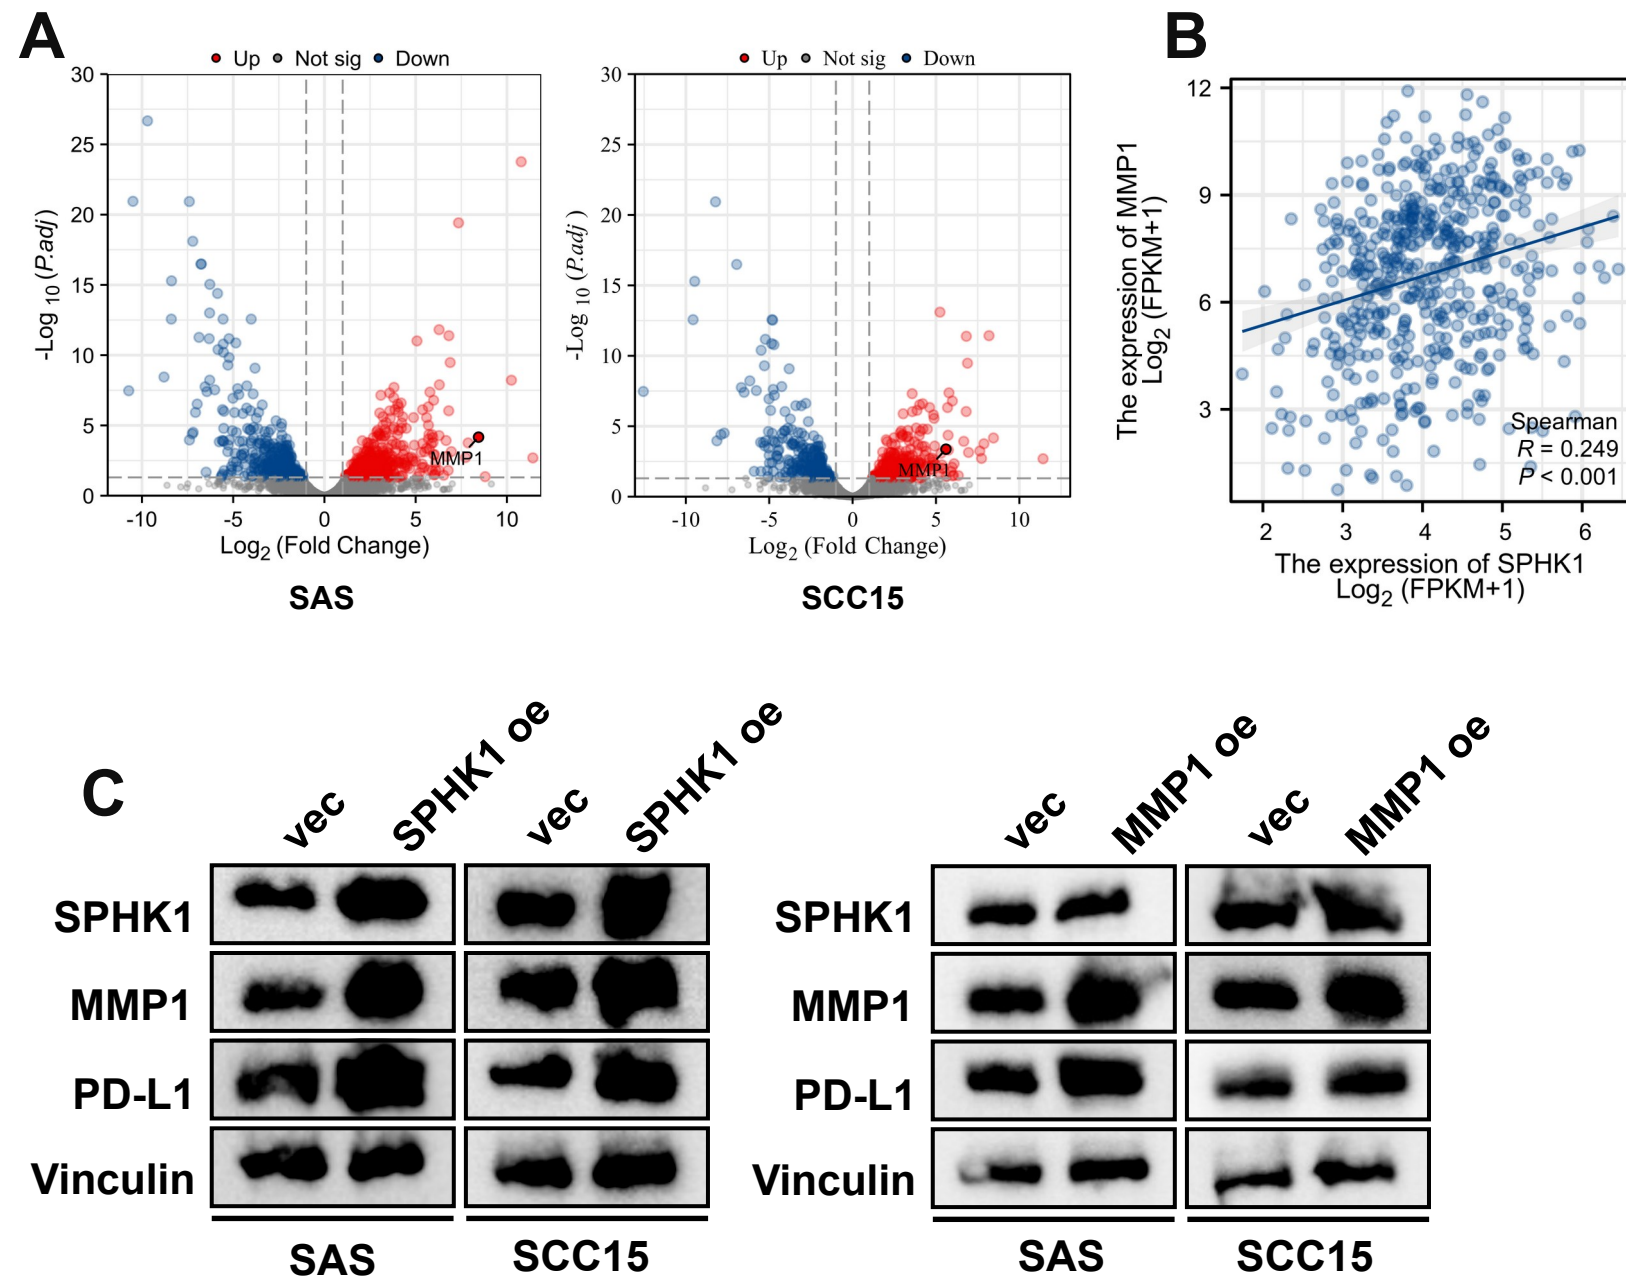

**Figure S2.** A. RNA-seq analysis and differential analysis were performed on WT and SPHK1-depleted SAS and SCC15 cells. B. Correlation analysis of SPHK1 levels with MMP1 in HNSCC patients in the TCGA database. C. Western blotting showed the effect of SPHK1/MMP1 overexpression in the HNSCC cell lines SAS and SCC15 on MMP1 and PD-L1 protein levels.

# Figure S3

A

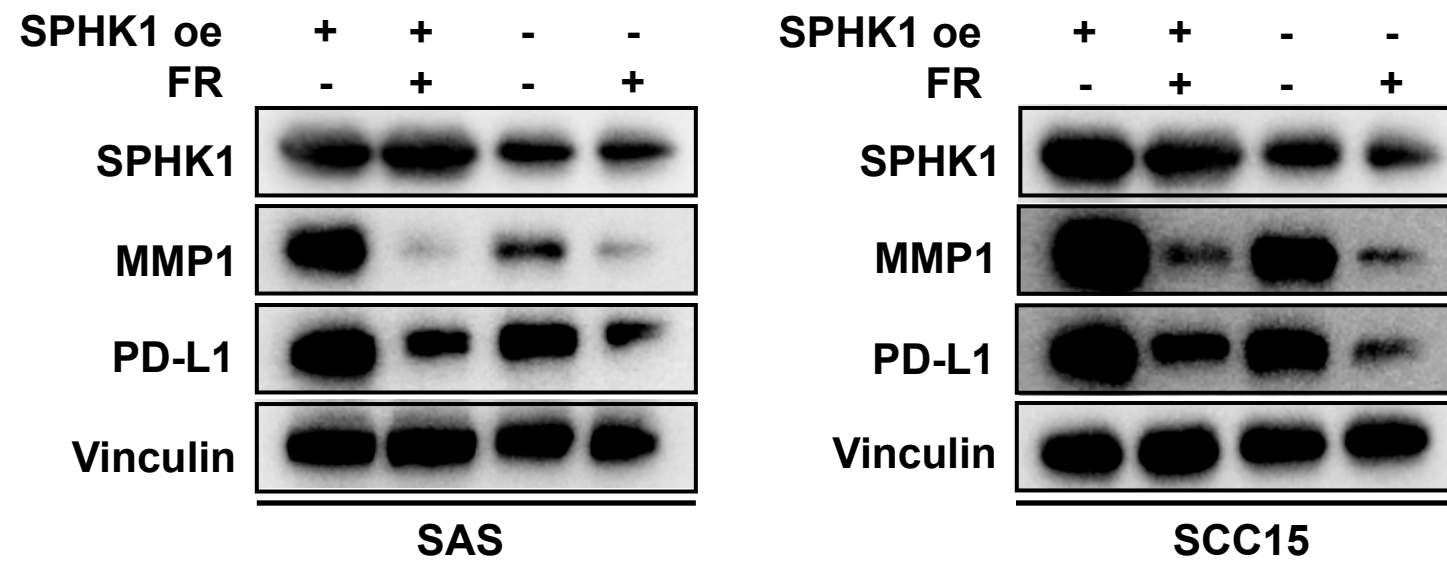

**Figure S3.** Western blotting showed the effect of ERK1/2 inhibitor FR 180204 on SPHK1 overexpression.

Supplementary Table 1. Baseline table of 117 HNSCC patients.

| <b>Characteristic</b> | <b>Low expression group<br/>(SPHK1)<br/>n = 59 (100%)</b> | <b>High expression group<br/>(SPHK1)<br/>n = 58 (100%)</b> |
|-----------------------|-----------------------------------------------------------|------------------------------------------------------------|
| Age                   |                                                           |                                                            |
| ≤47                   | 6                                                         | 3                                                          |
| >47                   | 53                                                        | 55                                                         |
| Gender                |                                                           |                                                            |
| Male                  | 42                                                        | 47                                                         |
| Female                | 17                                                        | 11                                                         |
| TNM stage             |                                                           |                                                            |
| I-II                  | 31                                                        | 17                                                         |
| III                   | 8                                                         | 19                                                         |
| IV                    | 20                                                        | 22                                                         |

Supplementary Table 2. List of Oligonucleotides used in this study.

| <b>Gene</b>                     | <b>Sense</b>            | <b>Antisense</b>         |
|---------------------------------|-------------------------|--------------------------|
| <b>RT-qPCR primers</b>          |                         |                          |
| SPHK1                           | TCTATAGTGCTGTTGTACACACC | CAAGCTCCTCCGGCTACTGAGTC  |
| GAPDH                           | GCGAACTCTGACTCTATCAGCG  | ACCACCCTGTTGCTGTAGCCAA   |
| MMP1                            | GCCTCTATTCATAGAGCGAAGC  | TGCATCCCAGCGGCTGACGTGC   |
| PD-L1                           | AGTAATCTATCAGCCTCTCAGT  | CCTGTTCGATGGCGAGCTTCTAGG |
| <b>siRNA targeting sequence</b> |                         |                          |
| siSPHK1                         | GAGGCUGAAAUCUCCUUCATT   | UGAAGGAGAUUUCAGCCUCTT    |
| siMMP1                          | GCAGCUUCCUUGAACCAUUTT   | AAUGGUUCAAGGAAGCUGCTT    |
| siPD-L1                         | GUGCACCCAAACUACUUCUTT   | AGAAGUAGUUUGGGUGCACTT    |

Supplementary Table 3. List of antibodies used in this study.

| <b>Antibodies used for western blot (WB), Immunofluorescence (IF) and immunohistochemistry (IHC)</b> |                      |                      |                    |                     |                         |                                            |
|------------------------------------------------------------------------------------------------------|----------------------|----------------------|--------------------|---------------------|-------------------------|--------------------------------------------|
| <b>anti-SPHK1</b>                                                                                    | <b>Supplier</b>      | <b>Catalogue No.</b> | <b>Application</b> | <b>Host species</b> | <b>Species activity</b> | <b>Dilution</b>                            |
| anti-SPHK1                                                                                           | Abcam                | ab26269              | WB, IF, IHC        | Rabbit              | Hu, Mo                  | 1:2000 for WB, 1:200 for IF, 1:200 for IHC |
| anti-SPHK1                                                                                           | Affinity Biosciences | DF6005-50            | WB, IF             | Mouse               | Hu, Mo                  | 1:1000 for WB                              |
| anti-MMP1                                                                                            | Abcam                | ab52631-100ul        | IF, IHC            | Rabbit              | Hu, Mo                  | 1:100 for IF, 1:200 for IHC                |
| anti-MMP1                                                                                            | Affinity Biosciences | DF6325-50            | WB                 | Mouse               | Hu                      | 1:2000 for WB                              |
| anti-MMP1                                                                                            | ABclonal             | A22080-50 µL         | WB                 | Rabbit              | Hu, Mo                  | 1:10000 for WB                             |
| anti-CD274                                                                                           | Proteintech          | 28076-1-AP-50ul      | IF, IHC            | Rabbit              | Hu, Mo                  | 1:100 for IF, 1:200 for IHC                |
| anti-CD274                                                                                           | ABclonal             | A18103-50 µL         | WB                 | Rabbit              | Hu, Mo                  | 1:3000 for WB                              |
| anti-CD274                                                                                           | ABclonal             | A21443-50 µL         | WB                 | Rabbit              | Hu, Mo                  | 1:2000 for WB                              |
| anti-CD8a                                                                                            | Servicebio           | GB15068-100          | IF                 | Mouse               | Mo                      | 1:100 for IF, 1:200 for IHC                |
| anti-CD8a                                                                                            | Proteintech          | CL594-66868          | IF, IHC            | Mouse               | Hu                      | 1:100 for IF                               |
| anti-GZMB                                                                                            | Proteintech          | 13588-1-AP-50ul      | IF, IHC            | Rabbit              | Hu, Mo                  | 1:100 for IF, 1:200 for IHC                |
| anti-pERK1/2                                                                                         | Proteintech          | 51068-1-AP-50ul      | IF, IHC            | Rabbit              | Hu, Mo                  | 1:100 for IF, 1:200 for IHC                |
